# Supplementary material for: Exploring Determinants of Spatial Variations in the Dengue Fever Epidemic Using Geographically Weighted Regression Model: A Case Study in the Joint Guangzhou-Foshan Area, China, 2014
Source: MDPI journal article supplement (doi:10.3390/ijerph14121518), 2017-12-06
Supplement: s1 [file s1]

# Supplementary Materials: Exploring Determinants of Spatial Variations in the Dengue Fever Epidemic Using Geographically Weighted Regression Model: A Case Study in the Joint Guangzhou-Foshan Area, China, 2014

Hongyan Ren 1,\* , Lan Zheng 1,2, Qiaoxuan Li 1,3, Wu Yuan 4 and Liang Lu 5,\*

**Table S1.** Correlation coefficients between LUL, economic level, road density, population size, and vegetation condition.

| Heading Column       | LUL | Economic Level | Road Density | Population Size | Vegetation Condition |
|----------------------|-----|----------------|--------------|-----------------|----------------------|
| LUL                  | /   | 0.49 ‡         | 0.81 ‡       | 0.52 ‡          | −0.29 ‡              |
| Economic level       |     | /              | 0.53 ‡       | 0.57 ‡          | −0.30 ‡              |
| Road densiy          |     |                | /            | 0.61 ‡          | −0.32 ‡              |
| Population size      |     |                |              | /               | −0.24 ‡              |
| Vegetation condition |     |                |              |                 | /                    |

‡ means the significance level (0.01).

© 2016 by the authors; licensee MDPI, Basel, Switzerland. This article is an open access article distributed

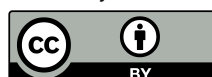

under the terms and conditions of the Creative Commons by Attribution (CC-BY) license (<http://creativecommons.org/licenses/by/4.0/>).
